# Supplementary material
Source: HighWire-hosted journal article supplement (http://bmjopenquality.bmj.com/highwire/filestream/136230/field_highwire_adjunct_files/0/ds3675.docx)
Supplement: ds3675.docx [file ds3675.docx]

Reducing contaminated instruments due to residual cement, and the impact this has on patient care:

1. When you opened your kit, were any of the instruments contaminated with residual cement?

Yes / No

1. If yes, what instrument(s) was/were contaminated?
2. Did you feel this had an impact on treatment of the patient?

Reducing contaminated instruments due to residual cement, and the impact this has on patient care:

1. When you opened your kit, were any of the instruments contaminated with residual cement?

Yes / No

1. If yes, what instrument(s) was/were contaminated?
2. Did you feel this had an impact on treatment of the patient?

Reducing contaminated instruments due to residual cement, and the impact this has on patient care:

1. When you opened your kit, were any of the instruments contaminated with residual cement?

Yes / No

1. If yes, what instrument(s) was/were contaminated?
2. Did you feel this had an impact on treatment of the patient?
